# Supplementary material for: Heritability and cross-species comparisons of human cortical functional organization asymmetry
Source: eLife. 2022 Jul 29;11:e77215. doi: 10.7554/eLife.77215 (PMC9381036; doi:10.7554/eLife.77215)
Supplement: Supplementary file 1. [file elife-77215-supp1.xlsx]

## Sheet: Table_S1
		Intra-hemisphere_G1					Inter-hemisphere_G1
ID	Label	mean	T-value	P_FDR	h2	h2_P_FDR	mean	T-value	P_FDR	h2	h2_P_FDR
1	V1	-0.00181273	-3.99408	8.5861e-05	0.10486	0.244682	-0.00102689	-2.30765	0.028504	0.0644593	0.542169
2	MST	-0.00736829	-15.149	3.60163e-46	0.118064	0.485127	0.00136138	2.26756	0.0314216	0.160527	0.339728
3	V6	-0.00404111	-12.2632	7.79669e-32	0.0806692	0.526316	0.001662	4.02317	0.000105753	0.0420446	0.479885
4	V2	-0.00315598	-10.5259	2.8357e-24	0.0753297	0.534699	0.00105978	2.61383	0.0125808	0.102657	0.542169
5	V3	-0.00296841	-9.80332	2.08572e-21	0.128391	0.407844	-0.000669605	-1.58632	0.136484	0.0646671	0.542169
6	V4	-0.00134575	-4.32353	2.12366e-05	0	0.526316	0.00279731	6.75751	5.75212e-11	0.0176317	0.542169
7	V8	-0.00110285	-3.27707	0.00131015	0.0836213	0.526316	0.00295447	6.87567	2.65688e-11	0.0344315	0.542169
8	4	-0.0040338	-10.8368	1.47728e-25	0.111013	0.0138116	0.00293586	5.72862	2.85906e-08	0.230939	0.337561
9	3b	-0.00530119	-11.8778	4.23052e-30	0.139876	0.0153673	0.000654149	1.00386	0.350761	0.188892	0.313948
10	FEF	-0.00564782	-6.46372	2.45971e-10	0.156473	0.0201332	-0.00169986	-2.35998	0.0249901	0.0725179	0.542169
11	PEF	-0.0034966	-3.45831	0.000693293	0.124617	0.010525	-0.00548473	-5.8194	1.71711e-08	0.139323	0.128551
12	55b	0.0597767	33.0812	5.75278e-162	0.242022	0.000576	0.0163091	9.13301	1.17684e-18	0.235558	9e-05
13	V3A	-0.00264094	-8.83468	8.33814e-18	0.120301	0.526316	0.000605434	1.57754	0.137981	0.0515833	0.542169
14	RSC	-0.0163914	-14.0914	1.06379e-40	0.104417	0.0928208	-0.00829106	-7.52499	3.03055e-13	0.153607	0.0348137
15	POS2	-0.0181976	-18.2296	1.3585e-63	0.136557	0.0256543	-0.00243341	-2.67731	0.0106889	0.149054	0.0832207
16	V7	-0.00225787	-7.05386	5.36704e-12	0.0561836	0.542574	0.000446894	1.13301	0.291484	0.0820766	0.542169
17	IPS1	-0.00215582	-5.19938	3.29787e-07	0.0692823	0.526316	-0.00181819	-3.62067	0.000486926	0.108306	0.542169
18	FFC	-0.00332007	-6.55481	1.39862e-10	0.0996884	0.519382	0.00570885	10.3228	3.07221e-23	0.099209	0.476643
19	V3B	-0.00203311	-6.34187	5.20808e-10	0.0344975	0.430492	0.000914527	2.14539	0.0416445	0.0611555	0.542169
20	LO1	-0.00253346	-7.18816	2.16177e-12	0.112834	0.473954	0.00196168	4.33215	2.98201e-05	0.044581	0.542169
21	LO2	-0.00408524	-10.3776	1.14751e-23	0.0821174	0.526316	0.00180075	3.64493	0.000455763	0.0560711	0.542169
22	PIT	-0.00217417	-4.90584	1.44441e-06	0.0485958	0.526316	0.00343939	6.70625	7.95191e-11	0	0.542169
23	MT	-0.00747425	-12.8151	2.14289e-34	0.0810883	0.526316	0.00169451	2.36406	0.0249055	0.165874	0.0443263
24	A1	-0.00795652	-12.6529	1.21178e-33	0.186007	0.00350723	-0.00304472	-4.13648	6.73981e-05	0.206219	0.0263061
25	PSL	0.0483074	26.7289	2.52142e-118	0.464706	8.01e-10	0.0254556	16.0489	6.10232e-51	0.345367	5.4e-05
26	SFL	0.048746	38.9975	4.14572e-202	0.0782803	0.0678238	0.00166398	1.06052	0.325304	0.176312	0.0182474
27	PCV	-0.00903569	-6.39259	3.82258e-10	0.0978418	0.0714343	0.00549812	4.25217	4.20513e-05	0.0519472	0.298556
28	STV	-0.00960472	-6.94952	1.06269e-11	0.119637	0.137354	0.0017213	1.35916	0.202527	0.0964227	0.150788
29	7Pm	-0.000869044	-0.680433	0.510569	0.237851	0.0109403	0.0226475	18.6661	4.92294e-66	0.232259	0.0050745
30	7m	0.00456837	6.52928	1.63327e-10	0.143522	0.0713527	0.00776999	10.2919	4.02653e-23	0.0757148	0.00803363
31	POS1	0.00997318	10.0331	2.6869e-22	0.158908	0.0155369	0.0248249	27.067	1.7068e-120	0.0211333	0.130776
32	23d	-0.0123019	-10.6312	1.07433e-24	0.18316	0.0231326	-0.0112108	-8.56423	1.24096e-16	0.136406	0.0927919
33	v23ab	0.00239046	3.16089	0.00193064	0.185757	0.0390923	0.00215126	2.93349	0.00514092	0.11451	0.0197987
34	d23ab	0.00663573	8.89884	4.93864e-18	0.169894	0.139042	0.00659736	7.03501	9.15975e-12	0.153584	0.177691
35	31pv	0.00544422	9.06318	1.29357e-18	0.10738	0.0771354	0.00471317	6.1247	2.92102e-09	0.0266882	0.075639
36	5m	-0.00571261	-10.5496	2.28923e-24	0	0.0713278	0.000870644	1.32661	0.21339	0.0603899	0.385026
37	5mv	-0.00214152	-4.49663	9.90165e-06	0.0512016	0.526316	0.000393631	0.703334	0.519531	0.150833	0.0339146
38	23c	-0.0191109	-28.3266	3.18428e-129	0.147053	0.103121	-0.0203243	-32.6528	1.40494e-158	0.115859	0.0499466
39	5L	-0.00499644	-11.9834	1.4144e-30	0.0455313	0.0982264	0.00135524	2.48212	0.0181667	0.0978032	0.241359
40	24dd	-0.00602676	-14.3377	6.07944e-42	0.130279	0.0276638	0.000390635	0.685794	0.525089	0.246593	0.0832015
41	24dv	-0.00481017	-11.365	8.06207e-28	0.210551	0.0254174	-0.00104869	-1.96715	0.0617986	0.174674	0.287409
42	7AL	-0.00371443	-9.50332	2.93668e-20	0.0971117	0.175885	-0.00488261	-9.02232	2.90585e-18	0.24195	0.0265973
43	SCEF	-0.00644244	-10.1151	1.27494e-22	0.200184	0.305363	-0.00778623	-12.8369	2.21303e-34	0.0213616	0.197377
44	6ma	-0.00610513	-10.2663	3.15014e-23	0.0972441	0.521339	-0.0134653	-21.9426	1.91581e-86	0.157295	0.016236
45	7Am	-0.00118872	-2.52767	0.0129259	0.0565764	0.143214	-0.0079488	-13.9404	8.97166e-40	0.195647	0.0445582
46	7PL	-0.00500158	-8.31025	5.47726e-16	0.131924	0.0152395	-0.010082	-16.2011	8.95864e-52	0.0244471	0.396683
47	7PC	-0.00353074	-8.17817	1.52665e-15	0	0.526316	-0.00162534	-2.62752	0.0121827	0.0845419	0.102779
48	LIPv	0.000190283	0.36635	0.722205	0.203447	0.113058	0.00228917	3.85461	0.00020923	0.246303	0.525274
49	VIP	0.00275097	5.67483	2.54746e-08	0.195596	0.4432	0.00455986	8.27708	1.16604e-15	0.163864	0.152801
50	MIP	-0.00469104	-6.83039	2.3437e-11	0.117527	0.207963	-0.0103276	-15.2276	1.63667e-46	0.0764769	0.542169
51	1	-0.00469691	-12.2089	1.3491e-31	0.0909827	0.0135348	0.00499499	9.04771	2.38666e-18	0.24121	0.169088
52	2	-0.00524733	-15.1159	5.27723e-46	0.0656102	0.0122082	0.0027544	5.16334	5.97142e-07	0.280598	0.0931426
53	3a	-0.00479264	-12.7577	3.89221e-34	0.211132	0.0153967	0.00256216	4.82745	3.19175e-06	0.229906	0.170411
54	6d	-0.00488676	-9.83256	1.61972e-21	0.035704	0.0510011	-0.000292648	-0.43372	0.691475	0.186839	0.101721
55	6mp	-0.00439677	-12.3042	5.10349e-32	0.0949821	0.137728	-0.00102115	-1.99009	0.0593871	0.207727	0.350073
56	6v	-0.000469071	-1.0743	0.294391	0.123261	0.526316	0.000393356	0.703498	0.52255	0.144862	0.542169
57	p24pr	0.00987636	9.05598	1.35977e-18	0.0748058	0.103043	0.00273531	2.89214	0.00581377	0.0340673	0.234168
58	33pr	-0.00685802	-4.83728	2.0126e-06	0.204209	0.0023	-0.0103383	-7.15412	4.08937e-12	0.162902	0.0121074
59	a24pr	-0.0082683	-14.4249	2.18719e-42	0.06441	0.259883	-0.0107251	-17.2641	8.30211e-58	0.0786275	0.0228909
60	p32pr	-0.00476923	-8.63463	4.14655e-17	0.0893168	0.327776	-0.00898862	-15.3662	3.00915e-47	0.106758	0.0760789
61	a24	0.00512632	4.71844	3.53468e-06	0.069412	0.0736675	0.0162279	13.6859	1.70019e-38	0.158319	0.0238851
62	d32	0.0204864	19.0801	1.10545e-68	0.0465307	0.246001	0.0253373	18.9598	8.6192e-68	0.0321076	0.233155
63	8BM	-0.00107341	-1.28415	0.212362	0.128094	0.0219344	0.00154359	1.53706	0.146577	0.0975104	0.120712
64	p32	-0.0041753	-3.10906	0.00226964	0.141361	0.0528631	0.0120721	7.69733	8.71052e-14	0.195839	0.0268161
65	10r	0.00599978	6.64049	8.10876e-11	0.0580183	0.0743802	-0.000696777	-0.692386	0.523771	0.0616991	0.101644
66	47m	0.00253157	1.43734	0.161711	0.206948	0.002493	-0.0321128	-17.922	1.26037e-61	0.137303	0.0341757
67	8Av	0.0105921	14.7487	4.4483e-44	0.0290793	0.424327	0.0158326	16.2674	3.97405e-52	0	0.348355
68	8Ad	-0.00935638	-13.3116	8.40177e-37	0.194398	0.0645876	-0.000868697	-1.05226	0.327502	0.142021	0.0263493
69	9m	0.00642752	9.63643	9.22904e-21	0.12211	0.0254857	0.002188	2.68709	0.0104653	0.228843	0.000315
70	8BL	0.00229735	4.27034	2.66901e-05	0.0890211	0.0336126	0.00215399	2.67632	0.0106364	0.184938	0.000894
71	9p	0.0200132	24.0098	4.63846e-100	0.0594954	0.0464239	0.0249429	23.0121	2.41394e-93	0.159176	0.004696
72	10d	-0.00209174	-2.71179	0.00770417	0.156252	0.0144804	-0.00159054	-1.55053	0.143676	0.108824	0.0237123
73	8C	-0.00577268	-5.48947	7.10972e-08	0.0371504	0.186099	-0.00287636	-2.17319	0.0391268	0.0436836	0.112253
74	44	0.0294853	21.9939	6.69349e-87	0.125872	0.0258181	0.0124467	8.34157	7.24812e-16	0.121009	0.018149
75	45	0.0497729	41.9228	1.36643e-221	0.125631	0.139543	0.0224626	15.458	9.86925e-48	0.118705	0.107624
76	47l	-0.00265753	-2.93339	0.00390577	0.063092	0.287413	-0.0174728	-13.3235	1.0353e-36	0.170087	0.0219189
77	a47r	-0.0015895	-1.80952	0.0770901	0.202786	0.00749647	-0.00409484	-3.76143	0.000300493	0.13241	0.505525
78	6r	-0.00574888	-8.94244	3.46536e-18	0.151628	0.0223531	-0.0175125	-29.9415	3.94397e-140	0.16524	0.0492901
79	IFJa	0.0160634	8.78564	1.23862e-17	0.0576001	0.139644	0.00596627	3.184	0.00230283	0.0545358	0.407617
80	IFJp	0.00356239	2.59224	0.0108142	0.190601	0.003606	0.000381034	0.297645	0.787922	0.253031	0.0495234
81	IFSp	0.02435	13.707	9.05705e-39	0.146316	0.127546	0.00758247	4.10562	7.6142e-05	0.144356	0.0261438
82	IFSa	0.0188528	20.2396	8.77874e-76	0.206904	0.0052788	0.000548678	0.607719	0.572116	0.237562	0.127213
83	p9-46v	-0.0365581	-37.9226	6.24338e-195	0.0793276	0.0149984	-0.0289567	-30.4494	1.46624e-143	0.106636	0.0158776
84	46	-0.0249266	-32.5361	3.00761e-158	0.252024	0.0102994	-0.025599	-39.5921	1.18213e-205	0.122678	0.0258724
85	a9-46v	-0.0136146	-12.0257	9.34397e-31	0.175057	0.026594	-0.00546043	-4.66779	6.54295e-06	0.144425	0.0565737
86	9-46d	-0.0283517	-26.0038	1.96985e-113	0.171914	0.00994745	-0.0263163	-31.0078	2.52162e-147	0.143774	0.0223486
87	9a	0.0100782	10.973	3.98205e-26	0.0846368	0.256682	0.00487095	3.70522	0.000367653	0.240492	0.00290925
88	10v	0.0185664	19.1239	6.23591e-69	0.0157533	0.213685	-0.00190264	-1.69673	0.110272	0.0553034	0.0494553
89	a10p	0.0196653	12.4363	1.26827e-32	0.24124	0.00275143	0.024058	13.1987	4.15012e-36	0.254257	0.00828
90	10pp	0.000907101	0.624186	0.544751	0.158706	0.0651532	-0.00577684	-3.05682	0.00350177	0.110088	0.0191762
91	11l	-0.0593727	-44.9633	2.46432e-241	0.232333	1.8e-05	-0.0471947	-34.2373	2.38546e-169	0.26788	0.000198
92	13l	0.0334565	21.3759	5.71815e-83	0.125056	0.0275601	0.0126775	7.38275	8.30563e-13	0.0983845	0.0142354
93	OFC	-0.000885743	-0.500988	0.626938	0.106429	0.0753974	0.000458719	0.206297	0.855614	0.0288129	0.348281
94	47s	0.0210896	19.4039	1.24817e-70	0.159366	0.0144513	0.0129178	9.88895	1.57908e-21	0.074497	0.0232157
95	LIPd	-0.00590425	-6.23814	9.82441e-10	0.0513	0.205968	-0.00418288	-4.7269	5.03575e-06	0.15337	0.140136
96	6a	-0.00424319	-7.38949	5.27716e-13	0.0475208	0.0106842	-0.014043	-23.6064	3.20447e-97	0.183978	0.0186227
97	i6-8	-0.00681348	-6.96582	9.6031e-12	0.0251559	0.145306	0.00332817	2.9418	0.00504815	0.13625	0.0314559
98	s6-8	-0.021283	-19.8373	2.71884e-73	0.176565	0.0140136	-0.0142987	-11.144	1.14863e-26	0.128425	0.074775
99	43	-0.00538756	-12.3997	1.85131e-32	0.0715729	0.201588	-0.000998729	-2.03224	0.0541151	0.0398604	0.435954
100	OP4	-0.0039329	-9.94416	6.0064e-22	0.0966214	0.0653259	0.00212404	4.15036	6.47705e-05	0.171976	0.542169
101	OP1	-0.00593079	-13.9599	4.91589e-40	0.126313	0.0161932	-0.000513855	-0.807133	0.460734	0.236951	0.297271
102	OP2-3	-0.00637882	-15.3552	2.92792e-47	0.157855	0.0243878	0.000933713	1.77875	0.0931812	0.158511	0.418873
103	52	-0.00855189	-15.597	1.44536e-48	0.0948951	0.122553	-0.00422373	-6.22513	1.6031e-09	0.0113518	0.165105
104	RI	-0.00251787	-6.1634	1.53949e-09	0.0958782	0.0258976	0.00435692	8.70303	4.07578e-17	0.132089	0.109047
105	PFcm	-0.00511121	-11.4198	4.68891e-28	0.102059	0.330134	-0.00253304	-4.74149	4.79667e-06	0.0921581	0.542169
106	PoI2	-0.00355901	-7.66739	7.17177e-14	0.131679	0.138606	-0.000719365	-1.25677	0.239762	0.0782063	0.542169
107	TA2	-0.00585575	-8.3703	3.43999e-16	0.1474	0.0274919	-4.26644e-05	-0.0536556	0.95722	0.20552	0.433848
108	FOP4	-0.00858576	-16.3149	1.52393e-52	0.150929	0.262828	-0.0108144	-20.258	9.83445e-76	0.106563	0.107627
109	MI	-0.005611	-10.584	1.66945e-24	0.173624	0.318538	-0.00611626	-10.4286	1.1539e-23	0.0316418	0.394603
110	Pir	-0.00225989	-1.80941	0.0766442	0.0755099	0.133606	0.00446136	3.2421	0.00190122	0.0633876	0.232215
111	AVI	-0.0167756	-14.2936	1.00619e-41	0.121788	0.327496	-0.0119729	-11.0204	3.84601e-26	0.0686601	0.0144117
112	AAIC	-0.0123236	-7.83349	2.1067e-14	0.0482765	0.432019	0.00693125	3.72518	0.000343248	0.0496533	0.217196
113	FOP1	-0.0098422	-17.618	5.32641e-60	0.257605	0.1869	-0.00896363	-14.6941	1.12381e-43	0.123618	0.123927
114	FOP3	-0.00522845	-9.83406	1.61739e-21	0.0261906	0.526316	-0.00634022	-9.98696	6.70667e-22	0.0393124	0.528294
115	FOP2	-0.00255582	-5.87508	8.31527e-09	0.0845793	0.111614	-0.00160427	-2.72995	0.00935448	0.122999	0.542169
116	PFt	0.00373385	8.95807	3.07285e-18	0.0567349	0.0218854	-0.00211671	-3.65424	0.000443735	0.175255	0.279884
117	AIP	0.00249119	5.16098	3.99988e-07	0.0083227	0.0438092	-0.00301111	-5.44014	1.3972e-07	0.11844	0.479171
118	EC	-7.02556e-05	-0.0361435	0.971175	0.0711834	0.24624	-0.000228689	-0.107301	0.930073	0.0282493	0.356748
119	PreS	0.0136058	8.73774	1.80084e-17	0.0702937	0.12915	0.0354572	19.8942	1.60326e-73	0.0684489	0.407879
120	H	0.00514913	3.09269	0.00238182	0.0991139	0.163535	0.00267477	1.56948	0.13929	0.0378026	0.414732
121	ProS	0.00535558	5.73607	1.82665e-08	0.123416	0.205392	0.0133853	12.7878	3.71685e-34	0.0645418	0.221333
122	PeEc	-0.00376211	-2.70647	0.00777894	0.0590061	0.163311	-0.00996891	-6.46063	3.82864e-10	0.0840134	0.177957
123	STGa	0.0332731	21.8186	8.56655e-86	0	0.389826	-0.01032	-6.32228	8.90291e-10	0	0.542169
124	PBelt	-0.00850685	-14.7669	3.65431e-44	0.193881	0.00565987	-0.000394964	-0.622361	0.565247	0.140453	0.147467
125	A5	0.0194794	16.3679	7.92313e-53	0.174104	0.00423257	0.00122865	1.14532	0.287486	0.162311	0.387861
126	PHA1	0.00288537	1.96426	0.0546286	0.0953817	0.103179	0.0155019	9.67661	1.05359e-20	0.102552	0.108208
127	PHA3	0.00141084	1.57264	0.125154	0.0651481	0.0976846	0.00484797	4.73263	4.95188e-06	0	0.417863
128	STSda	0.00849428	6.00268	3.95196e-09	0.0571602	0.0866268	-0.0167418	-9.94088	1.00266e-21	0.076378	0.237276
129	STSdp	0.0539921	35.4708	2.53418e-178	0.0826484	0.262108	0.0135446	8.1597	2.87105e-15	0.146352	0.02423
130	STSvp	0.00471974	6.99655	7.86507e-12	0.174575	0.0217189	0.000737072	0.769673	0.481826	0.1794	0.00536538
131	TGd	0.0181941	18.2976	5.53087e-64	0.171796	0.24333	0.0022794	1.82425	0.0849221	0.133637	0.0188398
132	TE1a	0.00860289	14.2849	1.09056e-41	0.053659	0.230678	0.00726414	10.4625	8.54303e-24	0.14507	0.003888
133	TE1p	0.000614423	0.688308	0.508362	0.0913261	0.0222139	0.00482029	4.85063	2.87991e-06	0.163431	0.0488431
134	TE2a	-0.0122839	-12.8138	2.13128e-34	0.125044	0.0670706	-0.0205912	-15.7007	4.78944e-49	0	0.211131
135	TF	0.0238305	13.8927	1.05864e-39	0.205348	0.00354436	0.017857	9.48721	5.55574e-20	0.107182	0.027918
136	TE2p	0.0124455	11.577	9.51013e-29	0.22556	0.003267	0.0036381	3.62976	0.000478719	0.244115	0.0294278
137	PHT	-0.000787364	-1.23947	0.228131	0.149518	0.0468285	-0.0125013	-18.6587	5.1559e-66	0.370804	0.0557398
138	PH	0.00809464	15.2063	1.81936e-46	0.146656	0.261777	0.00698456	13.4466	2.60872e-37	0.120489	0.542169
139	TPOJ1	0.00506705	3.05363	0.00267685	0.211524	0.0081747	0.00409957	2.72679	0.00936831	0.292897	0.0042336
140	TPOJ2	-0.0052718	-5.34344	1.55966e-07	0.234217	0.001764	0.00212338	2.21299	0.035633	0.288094	0.002124
141	TPOJ3	-0.00592842	-4.73843	3.23361e-06	0.0290645	0.442261	0.0023768	1.96846	0.0620402	0.0808964	0.107323
142	DVT	-0.00455645	-8.77082	1.38533e-17	0.117256	0.107702	6.01296e-05	0.107253	0.924886	0.0560582	0.570726
143	PGp	-0.00612814	-9.53807	2.18556e-20	0.141176	0.0261827	-0.00701089	-11.7194	3.4023e-29	0.0575803	0.126888
144	IP2	-0.0192048	-23.4981	1.07362e-96	0.116045	0.0150962	-0.00616538	-8.05331	6.42709e-15	0.230818	0.0079632
145	IP1	-0.0268757	-34.4066	4.63651e-171	0.0763237	0.0836008	-0.0228363	-28.0531	3.44487e-127	0.165218	0.0187692
146	IP0	0.00301983	4.38551	1.62007e-05	0.0015064	0.228171	0.00144234	2.23158	0.0342274	0.139767	0.542169
147	PFop	0.00170177	3.40935	0.000823186	0.123068	0.486941	-0.00129647	-2.12419	0.0435806	0.185887	0.542169
148	PF	-0.00149997	-3.27625	0.00130516	0.233152	0.0289679	-0.00983313	-20.1243	6.28926e-75	0.088065	0.126277
149	PFm	0.00291401	4.42689	1.35285e-05	0.166311	0.127417	0.00350025	4.37228	2.54347e-05	0.169993	0.277108
150	PGi	0.00619458	10.9063	7.57441e-26	0.140607	0.064692	0.00310719	4.04284	9.83242e-05	0.191529	0.005148
151	PGs	0.00151091	3.07029	0.00254958	0.15376	0.120865	0.0085613	12.997	3.80976e-35	0.124625	0.0257467
152	V6A	-0.00332234	-9.26135	2.39917e-19	0.0834911	0.386764	0.000594444	1.44559	0.173689	0	0.542169
153	VMV1	-0.000945214	-2.49214	0.0141974	0.039564	0.526316	0.00277291	5.96234	7.62329e-09	0.0565834	0.542169
154	VMV3	-0.00228276	-6.09075	2.3708e-09	0.0514534	0.526316	0.000395185	0.868601	0.425453	0.0477481	0.542169
155	PHA2	0.0210229	15.0482	1.18711e-45	0.116447	0.0144952	0.0353057	22.6066	1.00082e-90	0.106967	0.0290256
156	V4t	-0.00828872	-17.6589	3.17243e-60	0.0747706	0.526316	0.00171381	2.80969	0.00739676	0.0502617	0.406323
157	FST	-0.000516037	-1.13523	0.268482	0.129249	0.128971	0.00443646	7.83748	3.20823e-14	0.128419	0.445325
158	V3CD	-0.00105487	-3.11021	0.00227584	0.123262	0.526316	0.00275963	5.8928	1.13373e-08	0.235369	0.465865
159	LO3	-0.00287337	-7.6055	1.11879e-13	0.0691413	0.526316	0.00197348	4.14529	6.55405e-05	0.0676434	0.542169
160	VMV2	0.00213116	5.04589	7.18458e-07	0	0.526316	0.00286378	5.605	5.68379e-08	0	0.542169
161	31pd	0.00916992	11.2403	2.80535e-27	0.0313007	0.163816	0.0141426	13.0032	3.65132e-35	0.0338164	0.132382
162	31a	-0.0144904	-11.9887	1.35843e-30	0.059256	0.22989	-0.000463874	-0.352463	0.74955	0.021652	0.542169
163	VVC	-0.00296425	-7.09744	4.01532e-12	0.0842304	0.526316	5.1321e-05	0.0958269	0.928837	0.215991	0.580401
164	25	-0.00674507	-4.14279	4.61448e-05	0.0129342	0.139856	-0.00779688	-4.36394	2.61325e-05	3.83e-05	0.416115
165	s32	-0.00712761	-5.67929	2.50348e-08	0.03487	0.177906	-0.0124595	-7.83006	3.34051e-14	0.12019	0.0336396
166	pOFC	-0.00234886	-1.18244	0.249798	0.0758864	0.184483	0.00754656	3.5057	0.000744025	0.0416473	0.310503
167	PoI1	-0.00340596	-6.03887	3.21074e-09	0.0660958	0.405031	-0.00510733	-8.29869	1.00003e-15	0.0938833	0.187813
168	Ig	-1.69283e-05	-0.0366763	0.976173	0.0758547	0.0544765	0.00487516	8.04298	6.84918e-15	0.234007	0.177793
169	FOP5	-0.0205135	-16.9479	4.05501e-56	0.156792	0.0310053	-0.0201541	-17.7756	8.79766e-61	0.103595	0.012694
170	p10p	-0.0289362	-23.1932	1.03305e-94	0.192707	0.007732	-0.0239352	-15.7317	3.36282e-49	0.198123	0.026561
171	p47r	-0.0105357	-10.2792	2.82735e-23	0.192806	0.00817011	-0.0088039	-7.76773	5.24346e-14	0.186169	0.0629114
172	TGv	0.057439	35.7493	3.7055e-180	0.078968	0.40937	0.0217918	11.4981	3.25923e-28	0.081968	0.407451
173	MBelt	-0.0123505	-18.8542	2.5226e-67	0.230299	0.000936	-0.00523661	-6.33671	8.24242e-10	0.171632	0.0917868
174	LBelt	-0.00749852	-13.2186	2.36786e-36	0.201071	0.000498	-0.00111909	-1.65587	0.11926	0.211675	0.017676
175	A4	-0.00361272	-5.301	1.94221e-07	0.172413	0.0161525	0.000415037	0.578618	0.58916	0.171852	0.255282
176	STSva	0.00240123	2.93664	0.00388996	0.0640799	0.12633	-0.00397056	-3.6277	0.000478231	0.237272	0.0002988
177	TE1m	0.00736698	10.3603	1.33428e-23	0.0891178	0.0274665	0.00433057	5.16699	5.92633e-07	0.0650731	0.188908
178	PI	-0.00931008	-12.2555	8.32719e-32	0.104387	0.246932	-0.00250956	-2.8607	0.00636483	0.0396248	0.408787
179	a32pr	-0.00503797	-4.61475	5.74973e-06	0.126027	0.0225755	-0.0115684	-11.7434	2.71679e-29	0.0731789	0.0228567
180	p24	-0.00715905	-5.76473	1.56247e-08	0.0046911	0.371781	-0.00569403	-4.66794	6.60808e-06	0.104972	0.0855755
